# Supplementary material
Source: Research Square preprint supplement (doi:10.21203/rs.3.rs-9227737/v1)
Supplement: Supplementary file 1 [file 6fb2d9491cc729245f572fd7.pdf]

## Supplementary Material

### Weekly and daily symptoms

Weekly Symptoms Did you have to use Aerolin? Yes ( ) No ( )

Weekly Symptoms How many times (puffs)? Yes ( ) No ( )

Weekly Symptoms Did you have to go to the ER? Yes ( ) No ( )

Weekly Symptoms Were you hospitalized? Yes ( ) No ( )

Weekly Symptoms Did you change any medication? Yes ( ) No ( )

Daily Symptoms Did you have a cough? Yes ( ) No ( )

Daily Symptoms Did you have shortness of breath? Yes ( ) No ( )

Daily Symptoms How many liters of oxygen are you currently using?
